# Supplementary material for: Carbon nanoparticles as an interfacial layer between TiO2-coated ZnO nanorod arrays and conjugated polymers for high-photocurrent hybrid solar cells
Source: Royal Society of Chemistry journal article supplement (doi:10.1039/c3ra42614a), 2013-01-01
Supplement: c3ra42614a.pdf [file c3ra42614a.pdf]

Electronic Supplementary Information (ESI) for *RSC Advances*

This journal is © the Royal Society of Chemistry 2013

Electronic Supplementary Information (ESI)

**Carbon nanoparticles as an interfacial layer  
between TiO<sub>2</sub>-coated ZnO nanorod arrays and  
conjugated polymers for high-photocurrent  
hybrid solar cells**

Yong Li, Shaohua Li, Lu Jin, James B. Murowchick and Zhonghua Peng\*

pengz@umkc.edu

## Experimental

*General.* All reagents and solvents were used as received without further purification. Indium tin oxide (ITO) coated glass slides with sheet resistance of 8–12  $\Omega$ /square was purchased from Delta Technologies. SEM images were taken using a Philips SEM 515 scanning electron microscope or a Tescan Vega3 scanning electron microscope. Crystal structure characterization was carried out by X-ray diffraction measurements on a Rigaku Miniflex automated powder X-ray diffractometer (Cu K $\alpha$ , 35 kV 15 mA, Ni filter). FTIR spectra were measured with a Shimadzu IRAffinity-1 Fourier transform infrared spectrophotometer. UV-vis absorption spectra were recorded on a Hewlett-Packard 8452A diode array spectrophotometer. Fluorescence spectra were recorded with a Shimadzu RF-5301PC spectrofluorophotometer.

*Preparation of CNPs:* Graphite powders (< 20  $\mu$ m, Sigma-Aldrich) were placed into a stainless steel vial together with milling balls of different diameters (4–12 mm) in glove box. The powder-to-ball mass ratio was set to 1:10. The vial was then sealed and the ball milling was carried out for 40 h. The as-milled powders were placed in 5 M HNO<sub>3</sub> (15 mL) followed by reflux for 18 h in N<sub>2</sub>. The reaction mixture was then centrifuged at 3000 rpm for 10 min. The top clear dark brown-colored solution was collected, to which 5 M NaOH solution was added dropwise until pH reached 7~8. The mixture was passed through a 0.45  $\mu$ m filter. After adjusting the pH of the filtrate to 3~4 with 1 M HCl, dialysis was then performed on the solution with a Float-A-Lyzer G2 dialysis device (approximate molecular weight cut off 100–500 Daltons) to remove the salt(s). The resulting solution was evaporated under reduced pressure to yield water-soluble CNPs as black powders.

*Cyclic Voltammetry (CV) Measurements.* CV studies were carried out under argon using BAS Epsilon EC electrochemical station employing a 1 mm<sup>2</sup> Pt disk as the working electrode, Ag/AgNO<sub>3</sub> as the reference electrode and a Pt wire as the counter electrode. For the thin film measurement, a 2 mg mL<sup>-1</sup> CNP aqueous solution was drop-casted on the surface of Pt disk and the film was dried in air. A 0.1 M tetra-n-butylammonium hexafluorophosphate solution in acetonitrile was used as the supporting electrolyte. Its potential was internally calibrated using a ferrocene/ferrocenium (Fc/Fc<sup>+</sup>) redox couple whose absolute energy was assigned as -4.80 eV vs vacuum. Same with electrochemically synthesized graphene quantum dots,<sup>[S1]</sup> there are no obvious redox peaks observed during CV scans for the CNP film. For the solution measurement, a 0.2 M KNO<sub>3</sub> solution in DI water was used as supporting electrolyte and the scan rate was 20 mV s<sup>-1</sup>. CNPs were dissolved in DI water (~0.4 mg mL<sup>-1</sup>). K<sub>4</sub>Fe(CN)<sub>6</sub> was used as reference for the measurements and assigned an absolute energy of -4.80 eV vs vacuum.<sup>[S2]</sup>

*Fabrication and Characterization of HSCs:* TiO<sub>2</sub>-ZnO films were prepared following our previously published procedure.<sup>[S3]</sup> The TiO<sub>2</sub>-ZnO films were heated to 80 °C, immersed into a CNP solution [0.5 mg mL<sup>-1</sup> in H<sub>2</sub>O/EtOH (1/1, v/v)] and kept at r.t. overnight. The films were taken out, flushed with H<sub>2</sub>O/EtOH mixture (1/1, v/v) and dried by compressed air and then under vacuum at 50 °C for 6 h. P3HT (with number average molecular weight of 16.2 KDa and polydispersity index of 1.2) solution (30 mg mL<sup>-1</sup>) in 1,2-dichlorobenzene was heated at 50 °C with stirring for 14 h and then passed through a 0.45 µm filter. The P3HT film was deposited by spin coating the P3HT solution onto the TiO<sub>2</sub>-ZnO-CNP substrate at 600 rpm for 1 min. The films were annealed at 140 °C for 1 h under nitrogen atmosphere. Finally, a 120-nm thick Au layer was deposited onto the P3HT layer by thermal evaporation under high vacuum (< 2 × 10<sup>-6</sup>

MB). For comparison, corresponding CNP-free devices were also fabricated following the same procedures. Current–voltage characteristics of the devices were measured using a Keithley 2400 source meter. The devices were illuminated with an Oriel xenon arc lamp solar simulator with an AM1.5 filter at an intensity of  $\sim 100 \text{ mW cm}^{-2}$ .  $J_{\text{SC}}$ ,  $V_{\text{OC}}$ , and maximum output power density ( $J_{\text{max}}V_{\text{max}}$ ) were derived from the  $J$ – $V$  curves. The PCE was calculated by  $\eta = J_{\text{SC}}V_{\text{OC}}\text{FF}/P_{\text{in}}$ , where  $P_{\text{in}}$  is the incident power density and FF is given by  $J_{\text{max}}V_{\text{max}}/J_{\text{SC}}V_{\text{OC}}$ .

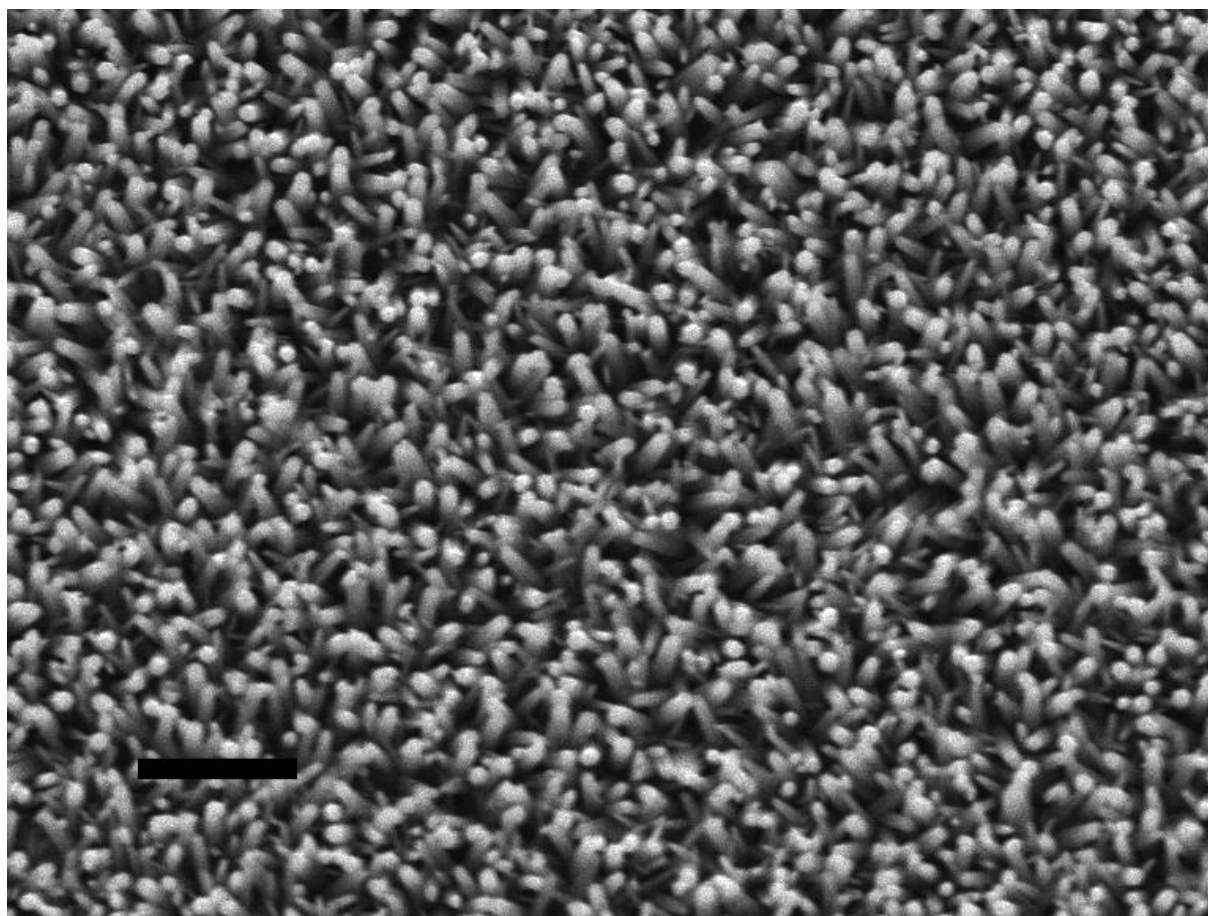

**Fig. S1** SEM image of ZnO nanorods. Scale bar: 2  $\mu\text{m}$ .

- [S1] Y. Li, Y. Hu, Y. Zhao, G. Shi, L. Deng, Y. Hou and L. Qu, *Adv. Mater.*, 2011, **23**, 776.
- [S2] K. E. Heusler and W. J. Lorenz, in *Standard Potentials in Aqueous Solution*, ed. A. J. Bard, R. Parsons, J. Jordan, Marcel Dekker, New York, USA, 1985, ch. 14.
- [S3] Y. Li, P. Lu, M. Jiang, R. Dhakal, P. Thapaliya, Z. Peng, B. Jha and X. Yan, *J. Phys. Chem. C*, 2012, **116**, 25248.
